# Supplementary material for: Spectroscopic characterization and crystal structures of two cathinone derivatives: 1-(4-chlorophenyl)-2-(1-pyrrolidinyl)-pentan-1-one (4-chloro-α-PVP) sulfate and 1-(4-methylphenyl)-2-(dimethylamino)-propan-1-one (4-MDMC) hydrochloride salts, seized on illicit drug market
Source: Springer Nature journal article supplement (doi:10.1007/s11419-017-0381-x), 2017-08-29
Supplement: MOESM1 [file 14937220]

**Spectroscopic characterization and crystal structure of two cathinone derivatives: 1-(4-chlorophenyl)-2-(1-pyrrolidynyl)pentan-1-one (4-chloro- $\alpha$ -PVP) hydrogen sulfate and 1-(4-methylphenyl)-2-(dimethylamino)propan-1-one (4-MDMC) hydrochloride, seized on illicit drug market.**

Piotr Kuś<sup>1</sup>, Joachim Kusz, Maria Książek, Ewelina Pieprzyca, Marcin Rojkiewicz

<sup>1</sup> Department of Chemistry, University of Silesia, 9, Szkolna Street, 40-006 Katowice, Poland

*E-mail address:* [pkus@ich.us.edu.pl](mailto:pkus@ich.us.edu.pl) (P. Kuś)

**Table S1.** NMR data of compounds **1** and **2** in DMSO-*d*<sub>6</sub> recorded at 400 MHz (<sup>1</sup>H) and 100.5 MHz (<sup>13</sup>C), respectively

(structures of compounds **1** and **2** with the numbering of carbon atoms)

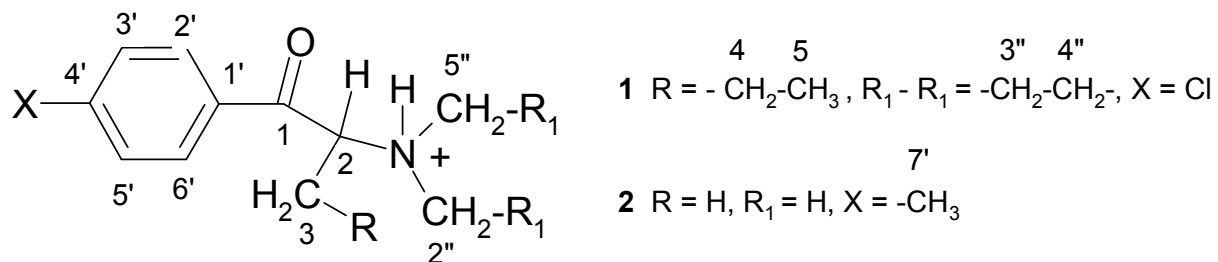

| Position | Compound <b>1</b>           |                     | Compound <b>2</b>            |                     |
|----------|-----------------------------|---------------------|------------------------------|---------------------|
|          | <sup>1</sup> H NMR          | <sup>13</sup> C NMR | <sup>1</sup> H NMR           | <sup>13</sup> C NMR |
|          | δ(ppm), J (Hz)              | δ(ppm)              | δ(ppm), J (Hz)               | δ(ppm)              |
| 1        |                             | 196.3               |                              | 195.2               |
| 2        | 5.30 (q, <i>J</i> =7.3, 1H) | 68.2                | 5.49 (bs, 1H)                | 62.2                |
| 3        | 1.96 (m, 2H)                | 32.2                | 1.75 (d, <i>J</i> =1.75, 3H) | 21.8                |
| 4        | 1.96 (m, 2H)                | 17.5                |                              |                     |
| 5        | 0.78 (t, 3H)                | 14.1                |                              |                     |
| 1'       |                             | 140.6               |                              | 131.3               |
| 2'/6'    | 8.12 (d, <i>J</i> =8.6, 2H) | 129.9               | 7.87 (d, <i>J</i> =8.3, 2H)  | 128.8               |
| 3'/5'    | 7.71 (d, <i>J</i> =8.6, 2H) | 131.3               | 7.31 (d, <i>J</i> =8.3, 2H)  | 130.0               |
| 4'       |                             | 133.3               |                              | 146.4               |
| 7'       |                             |                     | 2.42 (s, 1H)                 | 15.8                |
| 2''      | 3.61, 3.49 (2bs, 2H)        | 54.6                | 3.08, 2.98 (2bs, 6H)         | 37.9, 42.2          |
| 3''      | 2.04 (m, 2H)                | 23.2                |                              |                     |
| 4''      | 1.19, 1.01 (2m, 2H)         | 23.2                |                              |                     |
| 5''      | 3.28, 3.05 (2bs, 2H)        | 52.4                |                              |                     |
| N-H      | 10.1 (bs, 1H)               |                     | 12.5 (bs, 1H)                |                     |

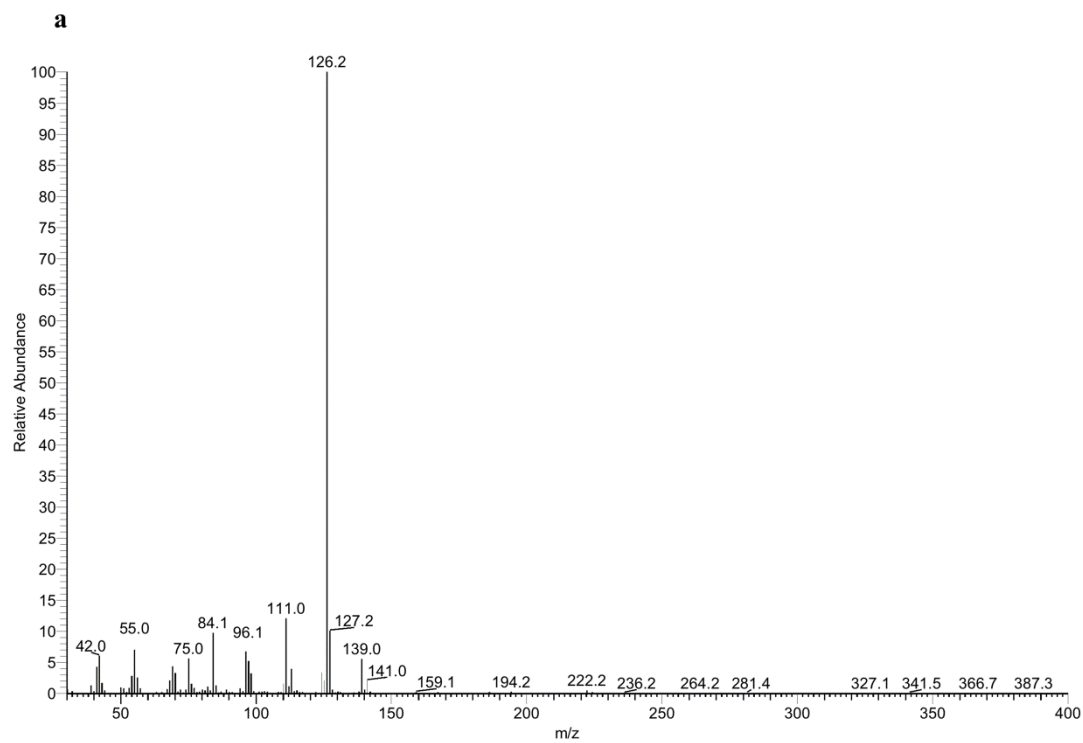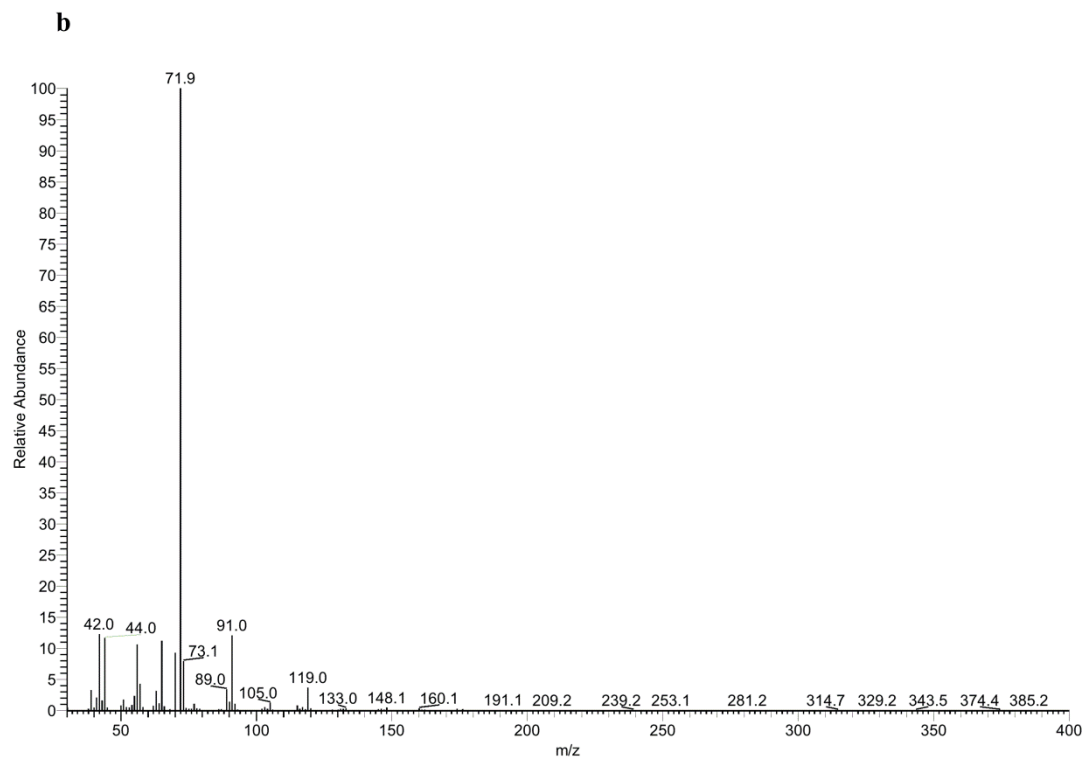

**Fig.S1** Electron ionization (EI) mass spectra of: **a** compound 1 and **b** compound 2

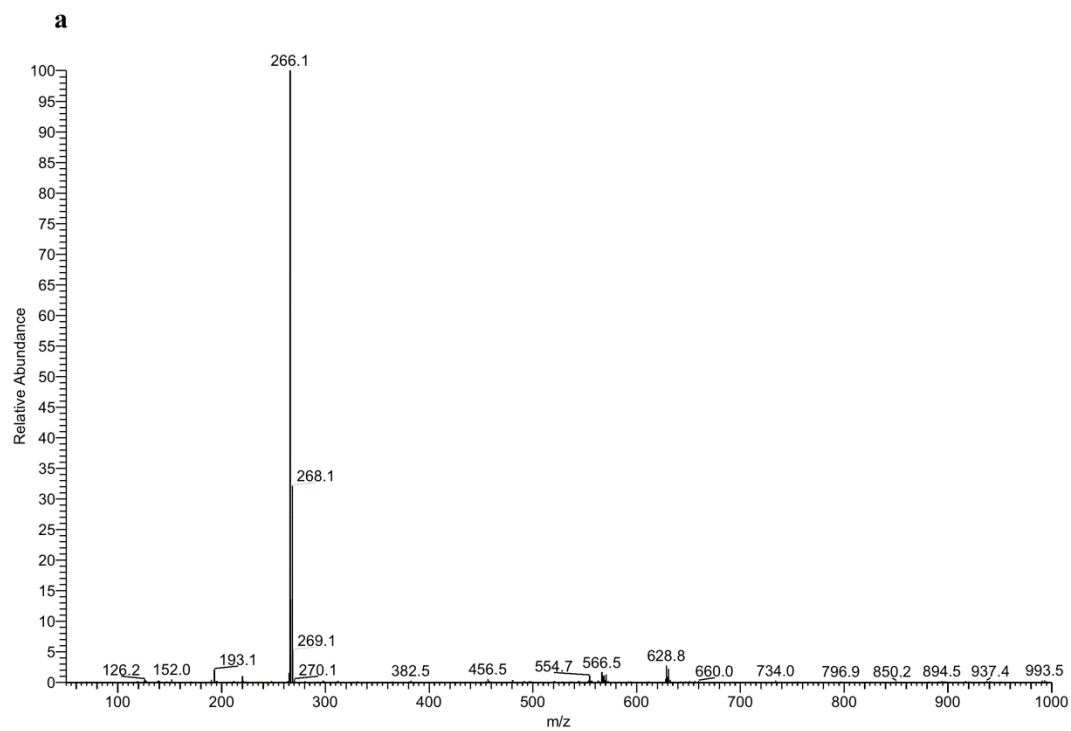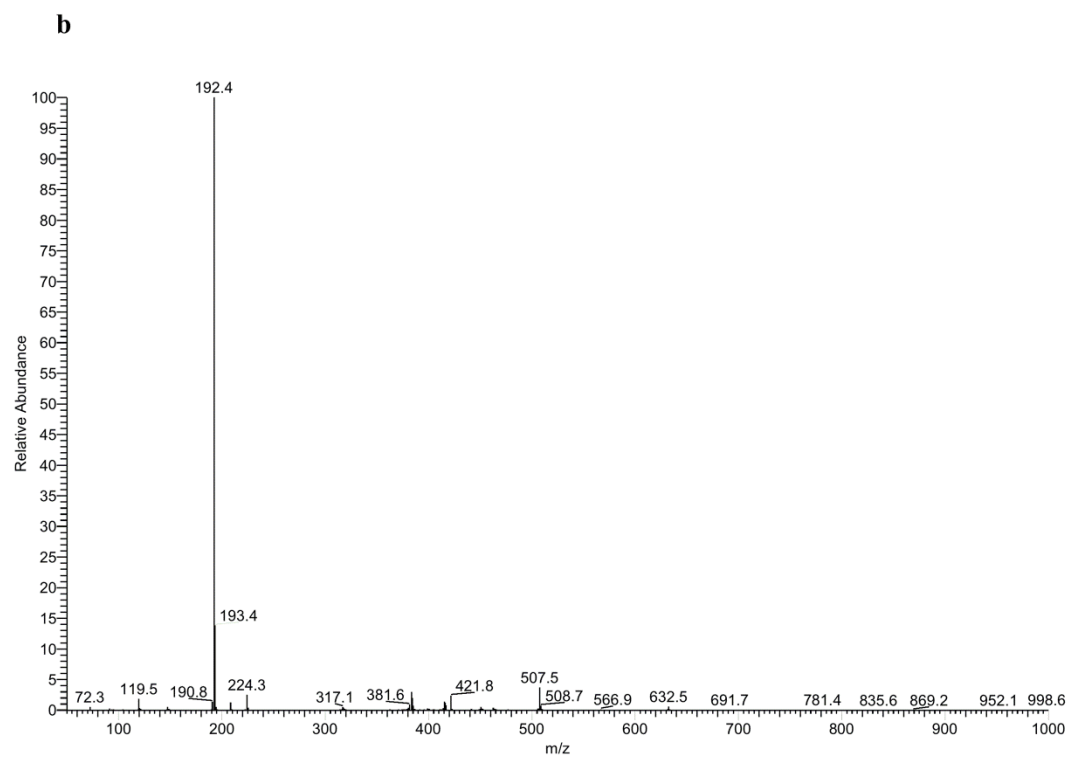

**Fig.S2** Electrospray ionization (ESI) mass spectra of **a** compound 1 and **b** compound 2

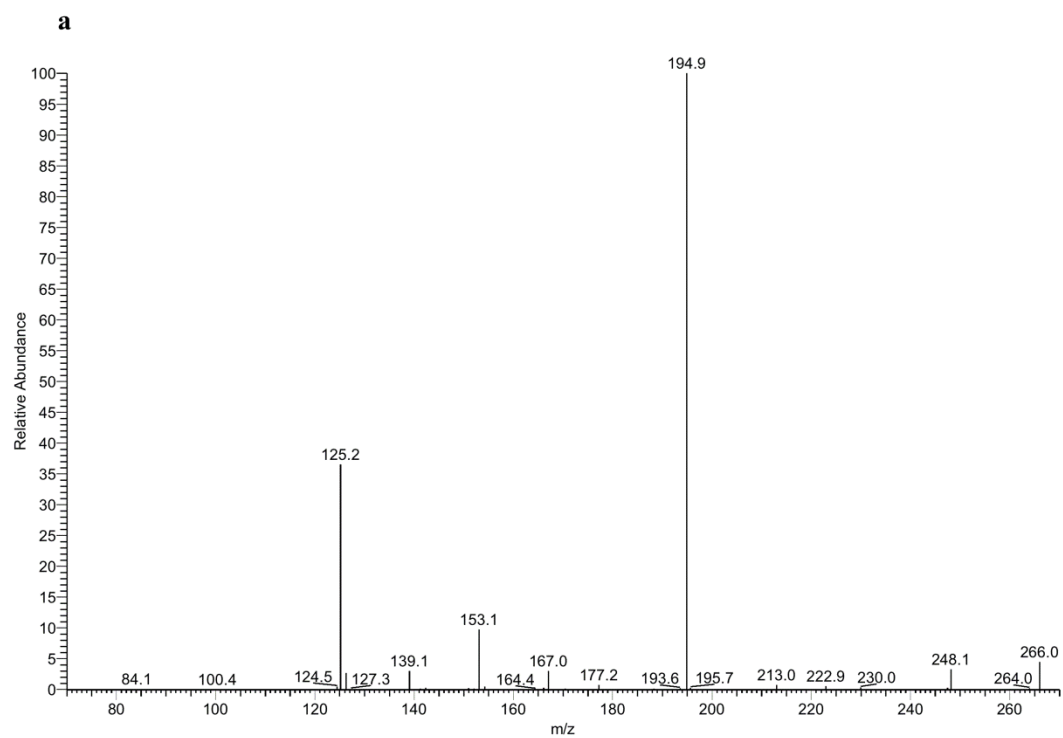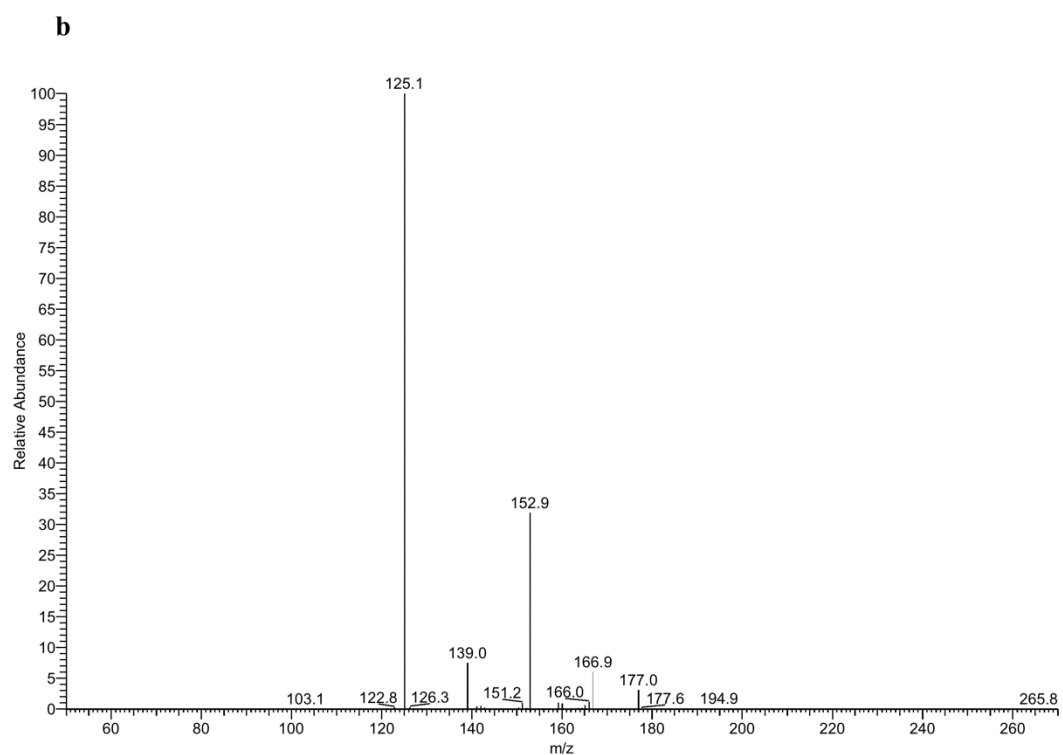

**Fig. S3** The ion mass spectra obtained by the ion trap mass spectrometry in the MS<sup>2</sup> (**a**) and MS<sup>3</sup> (**b**) mode for compound **1**. The precursor ions were used for the MS<sup>2</sup> and MS<sup>3</sup> modes: at *m/z* 266 and 195, respectively

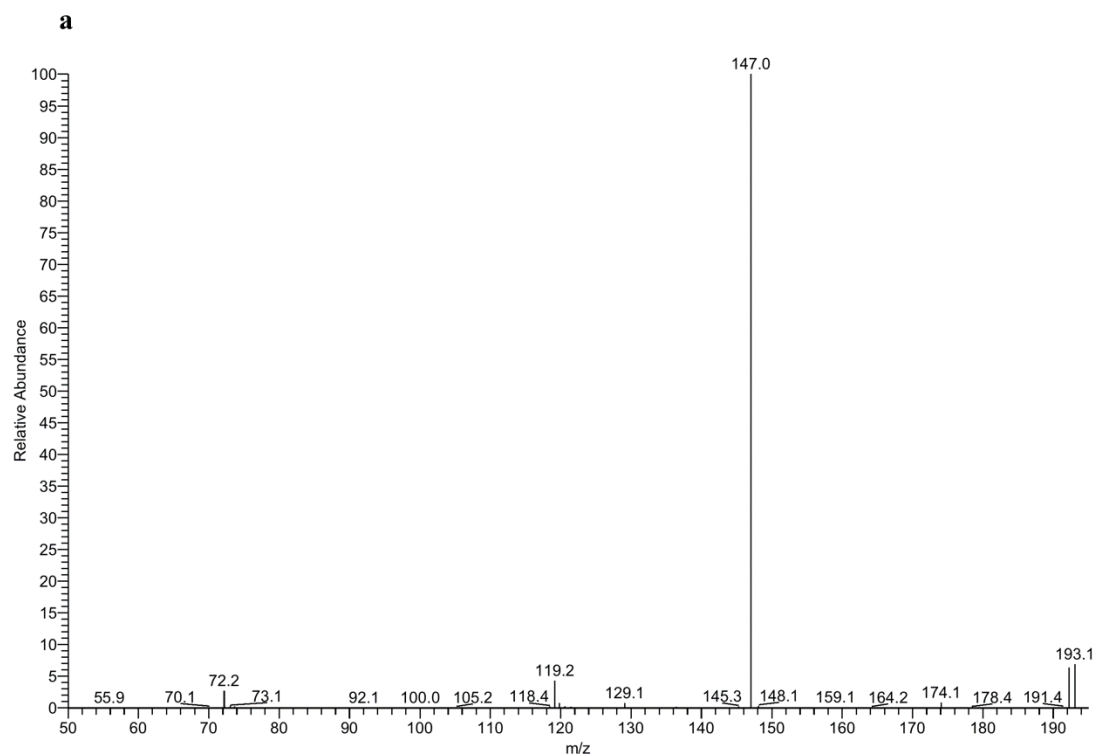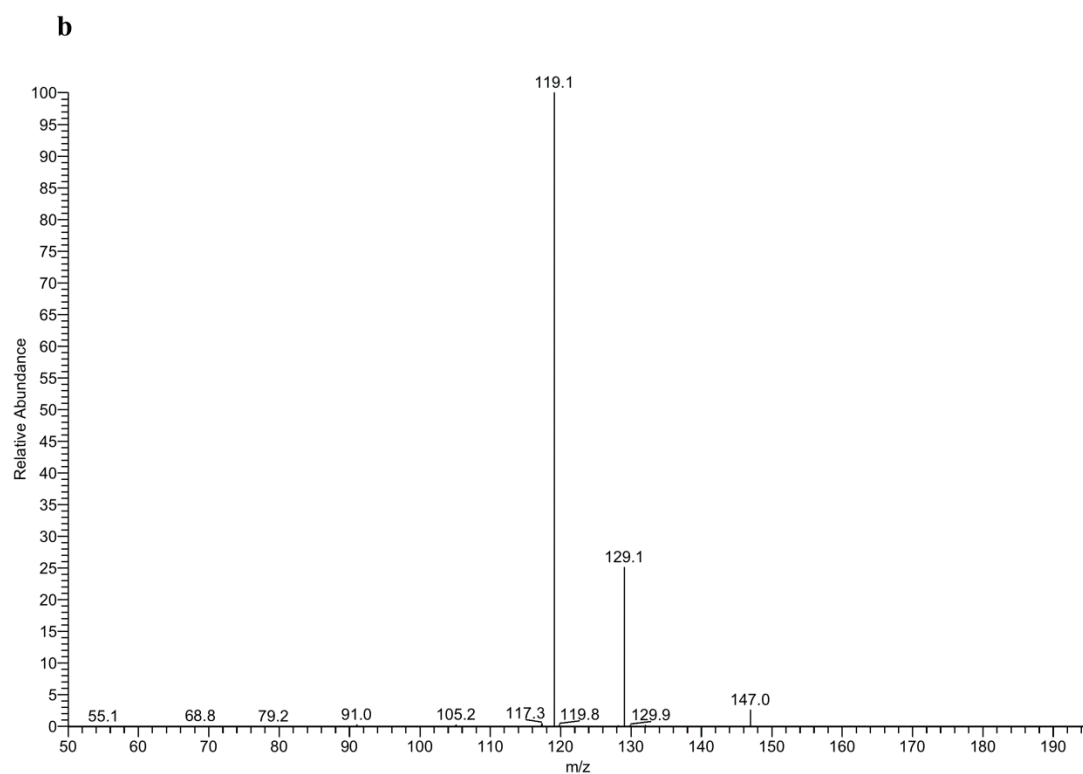

**Fig. S4** The ion mass spectra obtained by the ion trap mass spectrometry in the MS<sup>2</sup> (a) and MS<sup>3</sup> (b) mode for compound 2. The precursor ions were used for the MS<sup>2</sup> and MS<sup>3</sup> modes: at  $m/z$  192 and 147, respectively

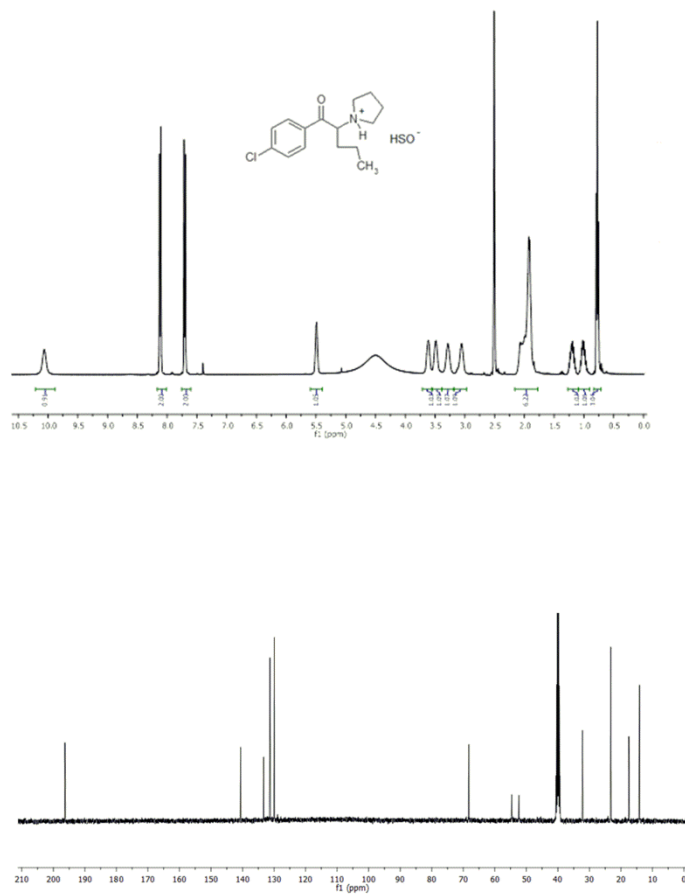

**Fig. S5** <sup>1</sup>H NMR (*upper*) and <sup>13</sup>C NMR (*lower*) spectra of compound **1** in DMSO-*d*<sub>6</sub>

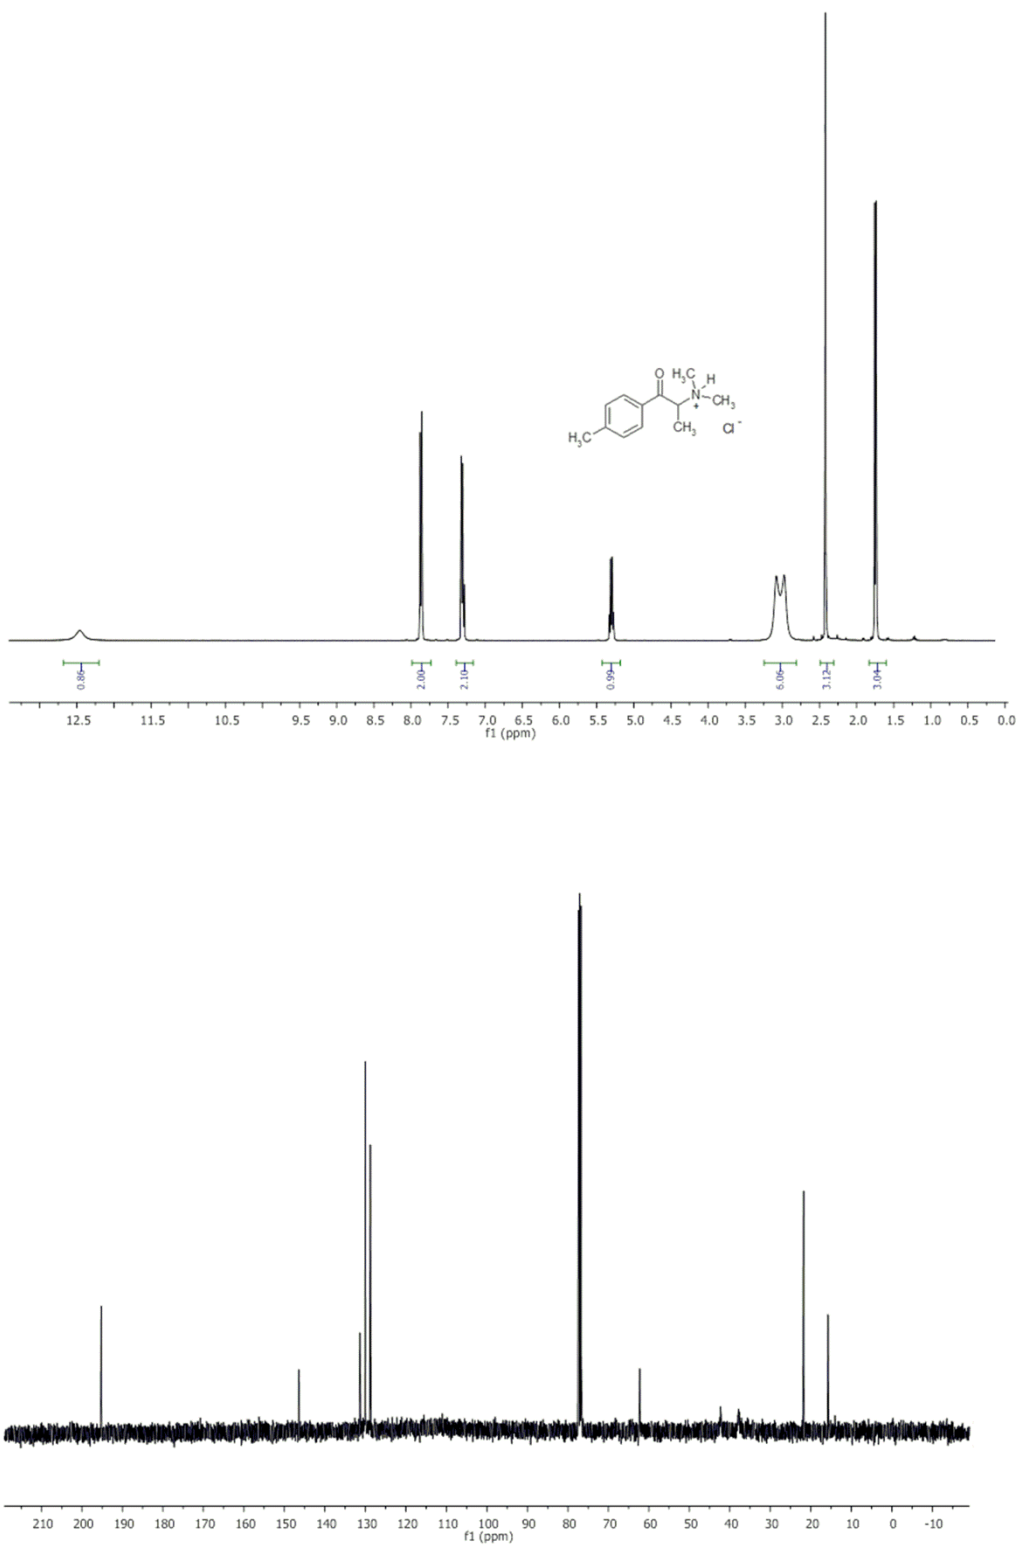

**Fig.S6** <sup>1</sup>H NMR (upper) and <sup>13</sup>C NMR (lower) spectra of compound **2** in CDCl<sub>3</sub>



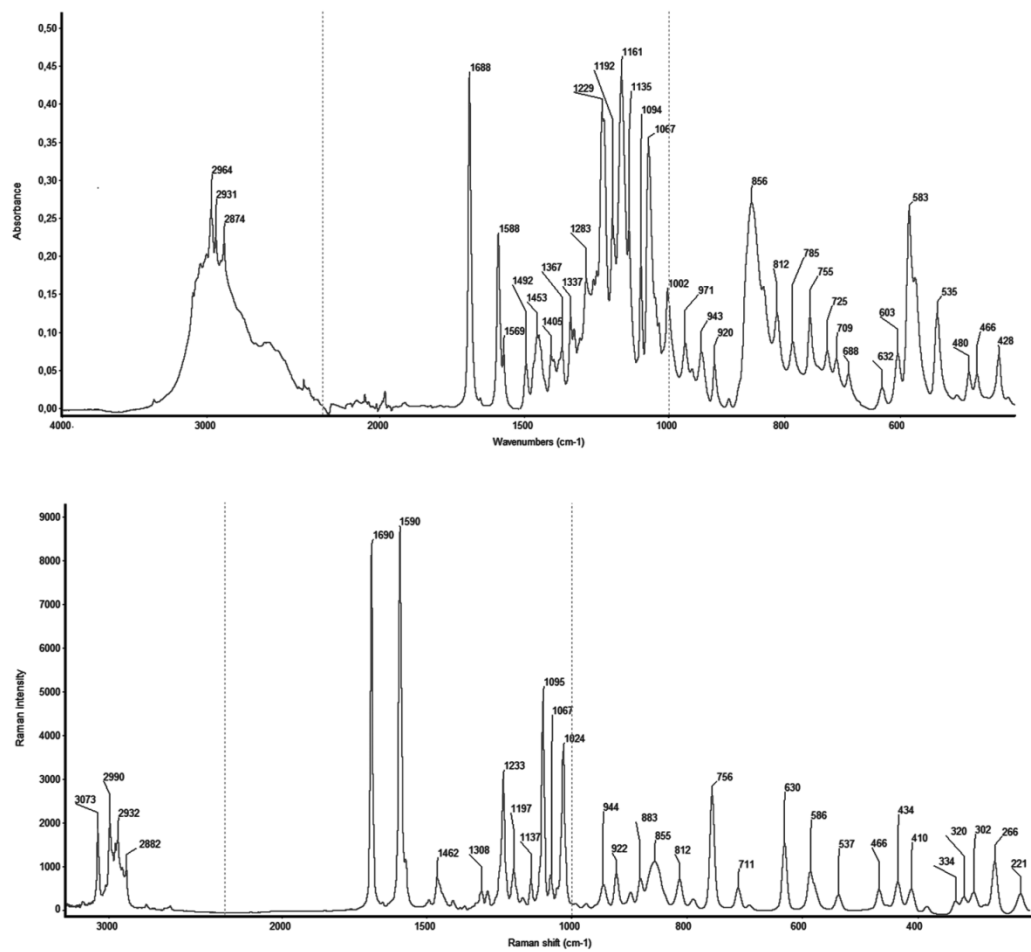

**Fig. S7** Infrared (*upper*) and Raman (*lower*) spectra of compound **1** (4-chloro- $\alpha$ -PVP hydrogen sulfate)

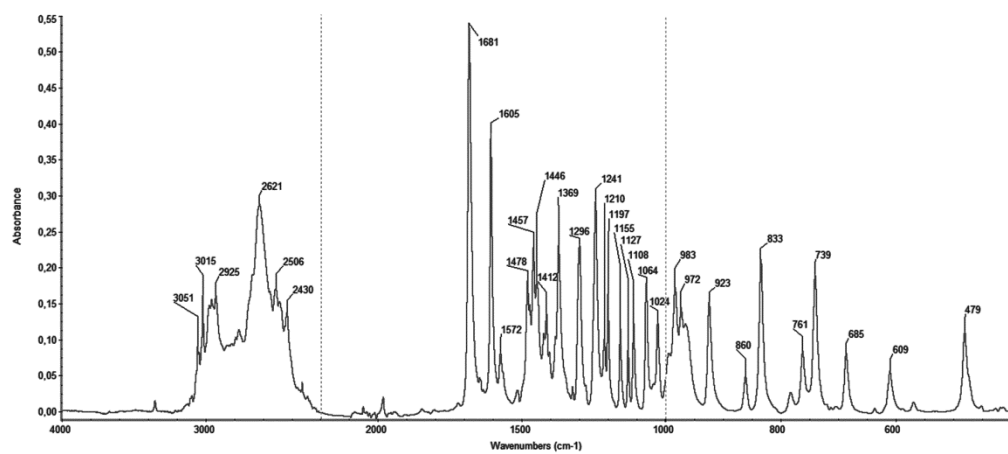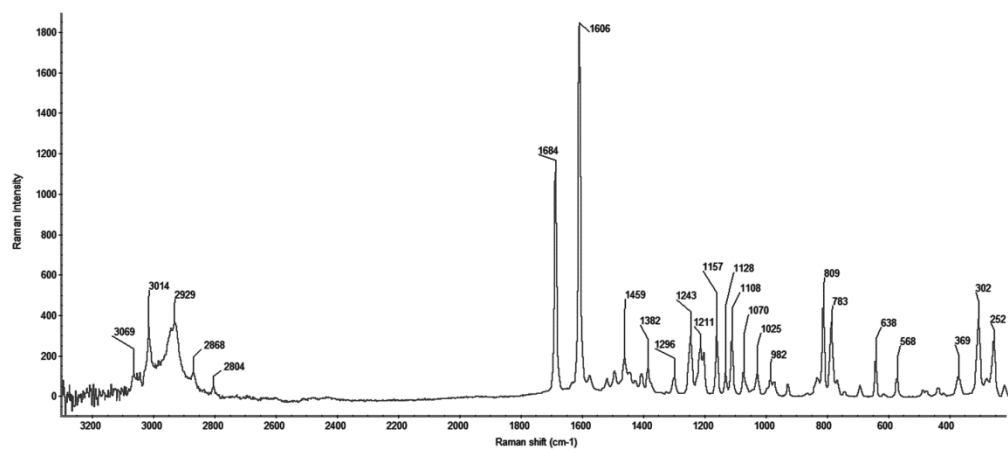

**Fig. S8** Infrared (*upper*) and Raman (*lower*) spectra of compound **2** (4-MDMC hydrochloride)
